# Supplementary material for: Spatial Localization of Recent Ancestors for Admixed Individuals
Source: PubMed Central journal article supplement (PMC4267945; doi:10.1534/g3.114.014274), 2014-11-03
Supplement: supp_g3.114.014274_014274SI.pdf [file supp_g3.114.014274_014274SI.pdf]

## **Spatial Localization of Recent Ancestors for Admixed Individuals**

Wen-Yun Yang<sup>1</sup>, Alexander Platt<sup>2</sup>, Charleston Wen-Kai Chiang<sup>2</sup>, Eleazar Eskin<sup>1,3,4</sup>, John Novembre<sup>5</sup>, and Bogdan Pasaniuc<sup>3,4,6</sup>

<sup>1</sup>Department of Computer Science, UCLA

<sup>2</sup>Department of Ecology and Evolutionary Biology, UCLA

<sup>3</sup>Interdepartmental Program in Bioinformatics, UCLA

<sup>4</sup>Department of Human Genetics, UCLA

<sup>5</sup>Department of Human Genetics, University of Chicago

<sup>6</sup>Department of Pathology and Laboratory Medicine, Geffen School of Medicine at UCLA

Corresponding Author:

Bogdan Pasaniuc

Department of Pathology & Laboratory Medicine

Geffen School of Medicine at University of California, Los Angeles

10833 Le Conte Ave, CHS 33-365

Phone: 310-825-3291

Fax: 310-825-4846

Email: [bpasaniuc@mednet.ucla.edu](mailto:bpasaniuc@mednet.ucla.edu)

**DOI: 10.1534/g3.114.014274**

## Expectation Maximization algorithm for haploid spatial ancestral inference

We would like to infer  $M$  ancestral location for a given mixed individual haplotype. This can be achieved by maximizing the likelihood function with respect to  $X$  as follows

$$L(h; X, \Pi) = \sum_Z P(Z; \Pi) \prod_{i=1}^L P(h_i | z_i; X)$$

By treating  $X$  as parameters and  $Z$  as hidden variables, this maximization falls in exactly the procedure of EM algorithm.

*E step.* In short, the expectation step is similar to forward-backward algorithm in HMM, which calculates the posterior probability of hidden variables  $Z$  given current estimation of ancestral locations  $X^{(t)}$ .

$$P(z_i = j | h; X^{(t)}) = \frac{\alpha_i(j)\beta_i(j)}{\sum_j \alpha_L(j)}$$

where  $\alpha$  and  $\beta$  can be calculated recursively

$$\begin{aligned} \alpha_1(j) &= (1/M)P(h_1 | z_1 = j; X^{(t)}) \\ \alpha_i(j) &= \sum_{j'} \alpha_{i-1}(j')P(z_i = j | z_{i-1} = j')P(h_i | z_i = j; X^{(t)}) \\ \beta_L(j) &= 1 \\ \beta_i(j) &= \sum_{j'} P(z_{i+1} = j' | z_i = j)P(h_{i+1} | z_{i+1} = j'; X^{(t)})\beta_{i+1}(j') \end{aligned}$$

*M step.* The maximization step needs to alternatively optimize the Q functions in  $X$  and in  $\Pi$ . The first can be done as follows

$$\begin{aligned} &Q(X; X^{(t)}, \Pi^{(t)}) \\ &= \sum_Z P(Z | h; X^{(t)}, \Pi^{(t)}) \ln \left( P(Z; \Pi) \prod_i P(h_i | z_i; X) \right) \\ &= \sum_j \left( \sum_i P(z_i = j | h; X^{(t)}, \Pi^{(t)}) \ln P(h_i | z_i = j; x_j) \right) + \text{const.} \\ &= \sum_{i,j} C_{ij} \ln P(h_i | z_i = j; x_j) + \text{const.} \\ &= \sum_{i,j} C_{ij} q_i(x_j) + \text{const.} \end{aligned} \tag{1}$$

where  $C_{ij}$  denotes the constant  $P(z_i = j | h, X^{(t)}, \Pi^{(t)})$ , and

$$q_i(x) = \begin{cases} -\ln(1 + \exp(a_i^T x + b_i)) & h_i = 0 \\ -\ln(1 + \exp(-a_i^T x - b_i)) & h_i = 1 \end{cases}$$

We use Newton's method to perform the maximization step, which is a widely used optimization technique. The gradient for the Q function in (1) can be computed as follows

$$\frac{\partial Q}{\partial x_j} = \sum_i C_{ij} \eta_i(x_j)$$

where

$$\eta_i(x_j) = \begin{cases} \frac{1}{1 + \exp(-a_i^T x_j - b_i)} (-a_i)^T & h_i = 0 \\ \frac{1}{1 + \exp(a_i^T x_j + b_i)} (a_i)^T & h_i = 1 \end{cases}$$

The Hessian matrix for the Q function in (1) can be obtained as follows

$$\frac{\partial^2 Q}{\partial x_j^2} = \sum_i C_{ij} \theta_i(x_j)$$

where

$$\theta_i(x_j) = \frac{1}{1 + \exp(-a_i^T x_j - b_i)} \cdot \frac{1}{1 + \exp(a_i^T x_j + b_i)} \cdot (-a_i a_i^T)$$

We also need to maximize the Q function in  $\Pi$ , which can be derived as follows

$$\begin{aligned} & Q(\Pi; X^{(t)}, \Pi^{(t)}) \\ &= \sum_Z P(Z|h; X^{(t)}, \Pi^{(t)}) \ln \left( P(Z; \Pi) \prod_i P(h_i | z_i; X) \right) \\ &= \sum_j \sum_k \left( \sum_i P(z_i = j, z_{i-1} = k | h; X^{(t)}, \Pi^{(t)}) \ln P(z_i = j | z_{i-1} = k; \Pi) \right) + \text{const.} \\ &= \sum_i \sum_j \left( \sum_{k \neq j} P(z_i = j, z_{i-1} = k | h; X^{(t)}, \Pi^{(t)}) \ln \pi_j + P(z_i = j, z_{i-1} = j | h; X^{(t)}, \Pi^{(t)}) \ln(1 - \tau_i(1 - \pi_j)) \right) + \text{const.} \\ &= \sum_{i,j} D_{ij} \ln \pi_j + E_{ij} \ln(1 - \tau_i(1 - \pi_j)) + \text{const.} \end{aligned} \tag{2}$$

where  $D_{ij}$  and  $E_{ij}$  denote the constants as follows

$$\begin{aligned} D_{ij} &= \sum_{k \neq j} P(z_i = j, z_{i-1} = k | h; X^{(t)}, \Pi^{(t)}) \\ E_{ij} &= P(z_i = j, z_{i-1} = j | h; X^{(t)}, \Pi^{(t)}) \end{aligned}$$

We use Newton's method to perform the maximization step. The gradient for Q function in (2) can be computed as follows

$$\frac{\partial Q}{\partial \pi_j} = \sum_{ij} \frac{D_{ij}}{\pi_j} + \frac{E_{ij} \tau_i}{1 - \tau_i(1 - \pi_j)}$$

The Hessian matrix for the Q function in (2) can be computed as follows

$$\frac{\partial^2 Q}{\partial \pi_j^2} = \sum_{ij} -\frac{D_{ij}}{\pi_j^2} - \frac{E_{ij} \tau_i^2}{(1 - \tau_i(1 - \pi_j))^2}$$

### Expectation Maximization algorithm for diploid spatial ancestral inference

We would like to infer  $M + N$  ancestral location for a given mixed individual genotype. This can be achieved by maximizing the likelihood function with respect to  $X$  and  $Y$  as follows

$$L(g; X, Y) = \sum_Z P(Z) \prod_{i=1}^L P(g_i | z_i^p, z_i^m; X, Y)$$

File S1  
Supplementary Note

By treating  $X$  and  $Y$  as parameters and  $Z$  as hidden variables, this maximization falls in exactly the procedure of EM algorithm.

*E step.* In short, the expectation step is similar to forward-backward algorithm in HMM, which calculates the posterior probability of hidden variables  $Z$  given current estimation of ancestral locations  $X^{(t)}$ .

$$P(z_i^p = j, z_i^m = k | g; X^{(t)}) = \frac{\alpha_i(j, k)\beta_i(j, k)}{\sum_{j, k} \alpha_L(j, k)}$$

where  $\alpha$  and  $\beta$  can be calculated recursively

$$\begin{aligned} \alpha_1(j, k) &= 1/(MN)P(g_1|z_1^p = j, z_1^m = k) \\ \alpha_i(j, k) &= \sum_{j', k'} \alpha_{i-1}(j', k')P(z_i^p = j|z_{i-1}^p = j')P(z_i^m = k|z_{i-1}^m = k')P(g_i|z_i^p = j, z_i^m = k) \\ \beta_L(j, k) &= 1 \\ \beta_i(j, k) &= \sum_{j', k'} P(z_{i+1}^p = j'|z_i^p = j)P(z_{i+1}^m = k'|z_i^m = k)P(g_{i+1}|z_{i+1}^p = j', z_{i+1}^m = k')\beta_{i+1}(j', k') \end{aligned}$$

*M step.* The maximization step needs to optimize the Q functions in  $X$ ,  $Y$ ,  $\Pi$  and  $\Omega$ . The Q function in  $X$  and  $Y$  can be done as follows

$$\begin{aligned} &Q(X, Y; X^{(t)}, Y^{(t)}, \Pi^{(t)}, \Omega^{(t)}) \\ &= \sum_{Z^p, Z^m} P(Z^p, Z^m | g; X^{(t)}, Y^{(t)}, \Pi^{(t)}, \Omega^{(t)}) \ln \left( P(Z^p; \Pi^{(t)})P(Z^m; \Omega^{(t)}) \prod_i P(g_i | z_i^p, z_i^m; X, Y) \right) \\ &= \sum_{j, k} \left( \sum_i P(z_i^p = j, z_i^m = k | g; X^{(t)}, Y^{(t)}, \Pi^{(t)}, \Omega^{(t)}) \ln P(g_i | z_i^p = j, z_i^m = k; x_j, y_k) \right) + \text{const.} \\ &= \sum_{i, j, k} C_{ijk} \ln P(g_i | z_i^p = j, z_i^m = k; x_j, y_k) + \text{const.} \\ &= \sum_{i, j, k} C_{ijk} q_i(x_j, y_k) + \text{const.} \end{aligned} \tag{3}$$

where  $C_{ijk}$  denotes the constant  $P(z_i^p = j, z_i^m = k | g, X^{(t)}, Y^{(t)}, \Pi^{(t)}, \Omega^{(t)})$ , and

$$q_i(x, y) = \begin{cases} -\ln(1 + \exp(a_i^T x + b_i)) - \ln(1 + \exp(a_i^T y + b_i)) & g_i = 0 \\ \ln \left( \frac{1}{(1 + \exp(a_i^T x + b_i))(1 + \exp(-a_i^T y - b_i))} + \frac{1}{(1 + \exp(-a_i^T x - b_i))(1 + \exp(a_i^T y + b_i))} \right) & g_i = 1 \\ -\ln(1 + \exp(-a_i^T x - b_i)) - \ln(1 + \exp(-a_i^T y - b_i)) & g_i = 2 \end{cases}$$

This function is not concave in general, since the function corresponding to heterozygous genotype  $g_i = 1$  is not concave. But we can still use convex optimization techniques to get a local optimal solution. In practice, we observe that the function is concave almost all the time. Thus, this proposed algorithm can well converge to an optimal solution.

Note that there is a subtle connection from the above EM algorithm to the parental location inference algorithm given previously [1]. For parental location inference, the hidden variables  $Z^p$  and  $Z^m$  would be fixed instead of random. Thus, the EM algorithm would be reduced to the algorithm given previously, which is equivalent to one M-step in the above EM algorithm.

The gradient for the Q function in (3) can be computed as follows

$$\frac{\partial Q}{\partial x_j} = \sum_{i, k} C_{ijk} \eta_{ik}(x_j, y_k)$$

File S1  
Supplementary Note

where

$$\eta_{ik}(x_j, y_k) = \begin{cases} -p_{ij}a_i & g_i = 0 \\ \frac{(1-2m_{ik})(1-p_{ij})p_{ij}}{p_{ij}(1-m_{ik}) + m_{ik}(1-p_{ij})} \cdot a_i & g_i = 1 \\ (1-p_{ij})a_i & g_i = 2 \end{cases}$$

The variables  $p_{ij}$  and  $m_{ik}$  are shorthands for the  $i$ th allele frequencies for paternal ancestry  $j$  and maternal ancestry  $k$  defined as

$$p_{ij} = \frac{1}{1 + \exp(-a_i^T x_j - b_i)}$$

$$m_{ik} = \frac{1}{1 + \exp(-a_i^T y_k - b_i)}$$

The Hessian for the Q function in (3) can be computed as follows

$$\frac{\partial^2 Q}{\partial x_j^2} = \sum_{i,k} C_{ijk} \theta_{ik}(x_j, y_k)$$

where

$$\theta_{ik}(x_j, y_k) = \begin{cases} (1-p_{ij})p_{ij}(-a_i a_i^T) & g_i = 0 \\ (1-2m_{ik}) \frac{1-p_{ij}}{\left(\frac{1-m_{ik}}{1-p_{ij}} + \frac{m_{ik}}{p_{ij}}\right)^2} \frac{p_{ij}}{m_{ik}(1-p_{ij})} (-a_i a_i^T) & g_i = 1 \\ (1-p_{ij})p_{ij}(-a_i a_i^T) & g_i = 2 \end{cases}$$

and

$$\frac{\partial^2 Q}{\partial x_j \partial y_k} = \sum_i I(g_i = 1) \left[ \frac{m_{ik}(1-m_{ik})(1-2m_{ik})p_{ij}(1-p_{ij})(1-2p_{ij})}{[(1-m_{ik})p_{ij} + (1-p_{ij})m_{ik}]^2} + \frac{2m_{ik}(1-m_{ik})p_{ij}(1-p_{ij})}{(1-m_{ik})p_{ij} + (1-p_{ij})m_{ik}} \right] (-a_i a_i^T)$$

The function  $I(g_i = 1)$  is an indicator function, which is equal to 1 if  $g_i = 1$ , and equal to 0 otherwise.

We also need to maximize the Q function in  $\Pi$  and  $\Omega$ , which can be derived as follows

$$\begin{aligned} & Q(\Pi; X^{(t)}, Y^{(t)}, \Pi^{(t)}, \Omega^{(t)}) \tag{4} \\ &= \sum_{Z^p, Z^m} P(Z^p, Z^m | g; X^{(t)}, Y^{(t)}, \Pi^{(t)}, \Omega^{(t)}) \ln \left( P(Z^p; \Pi) P(Z^m; \Omega) \prod_i P(g_i | z_i^p, z_i^m; X, Y) \right) \\ &= \sum_j \sum_k \left( \sum_i P(z_i^p = j, z_{i-1}^p = k | h; X^{(t)}, Y^{(t)}, \Pi^{(t)}, \Omega^{(t)}) \ln P(z_i^p = j | z_{i-1}^p = k; \Pi) \right) + \text{const.} \\ &= \sum_i \sum_j \left( \sum_{k \neq j} P(z_i^p = j, z_{i-1}^p = k | g; X^{(t)}, Y^{(t)}, \Pi^{(t)}, \Omega^{(t)}) \ln \pi_j \right. \\ &\quad \left. + P(z_i^p = j, z_{i-1}^p = j | g; X^{(t)}, Y^{(t)}, \Pi^{(t)}, \Omega^{(t)}) \ln(1 - \tau_i(1 - \pi_j)) \right) + \text{const.} \\ &= \sum_{i,j} D_{ij} \ln \pi_j + E_{ij} \ln(1 - \tau_i(1 - \pi_j)) \tag{5} \end{aligned}$$

File S1  
Supplementary Note

where  $D_{ij}$  and  $E_{ij}$  denote the constants as follows

$$\begin{aligned} D_{ij} &= \sum_{k \neq j} P(z_i^p = j, z_{i-1}^p = k | g; X^{(t)}, Y^{(t)}, \Pi^{(t)}, \Omega^{(t)}) \\ E_{ij} &= P(z_i^p = j, z_{i-1}^p = j | g; X^{(t)}, Y^{(t)}, \Pi^{(t)}, \Omega^{(t)}) \end{aligned}$$

We use Newton's method to perform the maximization step. The gradient for Q function in (5) can be computed as follows

$$\frac{\partial Q}{\partial \pi_j} = \sum_{ij} \frac{D_{ij}}{\pi_j} + \frac{E_{ij} \tau_i}{1 - \tau_i(1 - \pi_j)}$$

The Hessian matrix for the Q function in in (2) can be computed as follows

$$\frac{\partial^2 Q}{\partial \pi_j^2} = \sum_{ij} -\frac{D_{ij}}{\pi_j^2} - \frac{E_{ij} \tau_i^2}{(1 - \tau_i(1 - \pi_j))^2}$$

Similarly, the derivation of Q function in  $\Omega$  can be done by replacing all  $Z^p$  variables with  $Z^m$ .

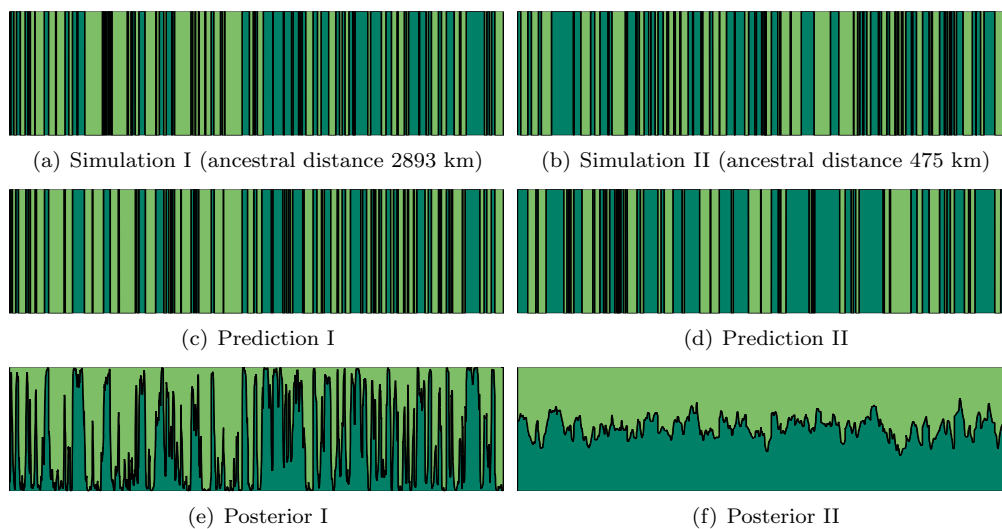

Figure S1: Example of local ancestry prediction results for distant and close ancestors.

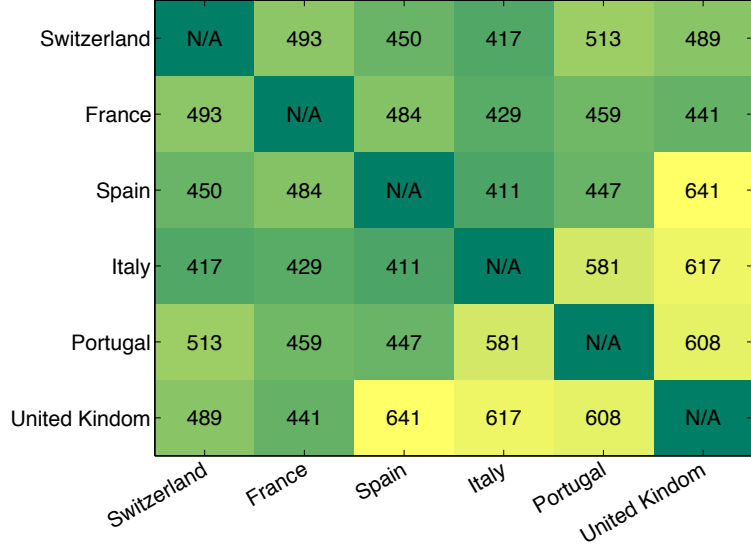

Figure S2: Average Prediction error (Km) for six country pairs with largest populations.



|               |     |    |    |     |    |     |
|---------------|-----|----|----|-----|----|-----|
| Switzerland   | 0   | 28 | 63 | 121 | 61 | 87  |
| France        | 28  | 0  | 18 | 55  | 23 | 30  |
| Spain         | 63  | 18 | 0  | 52  | 41 | 42  |
| Italy         | 121 | 55 | 52 | 0   | 67 | 104 |
| Portugal      | 61  | 23 | 41 | 67  | 0  | 61  |
| United Kindom | 87  | 30 | 42 | 104 | 61 | 0   |

Figure S3: Number for simulations for six country pairs with largest populations.

Table S1: Average distance between inferred and true ancestry locations in simulated admixed individuals from POPRES data. Simulations assume 4 generations in the mixture process. Independent SNP model denotes the extension of SPA that ignores admixture-LD. It can also be understood as SPAMIX with completely random transition probability between nearby SNPs. SPAMIX (logistic) represents simulation results starting from haplotypes generated at a location on a map using a Bernoulli sampling from the logistic gradients (see Methods). Parenthesis denotes the standard deviations. We found that Linkage Disequilibrium (LD) significantly affects the ancestry inference as well as the local ancestry inference. We observe more recombination events than expected if using the correct recombination probability (used in simulations). We circumvent this bias multiplying the transition probability by a factor  $10^{-1}$ ,  $10^{-2}$ ,  $10^{-4}$  and  $10^{-5}$  for the pruned SNP list with 0.1, 0.2, 0.5 and 0.8 pruning thresholds. 44,699, 72,418, 136,284, 194,432 SNPs were retained at the 4 pruning thresholds.

| No. of ancestry       |                  | 1        | 2        | 3        | 4        |
|-----------------------|------------------|----------|----------|----------|----------|
| Independent SNP model | Pruned SNP (0.1) | 425(252) | 961(540) | 977(599) | 982(655) |
|                       | Pruned SNP (0.2) | 443(265) | 880(491) | 898(530) | 880(578) |
|                       | Pruned SNP (0.5) | 420(245) | 823(448) | 855(502) | 810(494) |
|                       | Pruned SNP (0.8) | 421(259) | 810(429) | 845(491) | 813(505) |
| SPAMIX                | Pruned SNP (0.1) | 425(252) | 558(314) | 596(353) | 621(405) |
|                       | Pruned SNP (0.2) | 443(265) | 550(326) | 591(367) | 639(423) |
|                       | Pruned SNP (0.5) | 420(245) | 557(359) | 630(522) | 657(617) |
|                       | Pruned SNP (0.8) | 421(259) | 589(557) | 809(895) | 878(848) |

Table S2: Average distance between inferred and true ancestry locations in simulated admixed individuals from POPRES data. Independent SNP model denotes the extension of SPA that ignores admixture-LD. It can also be understood as SPAMIX with completely random transition probability between nearby SNPs. SPAMIX (logistic) represents simulation results starting from haplotypes generated at a location on a map using a Bernoulli sampling from the logistic gradients (see Methods). Parenthesis denote the standard deviations. We found that Linkage Disequilibrium (LD) significantly affects the ancestry inference as well as the local ancestry inference in unaccounted for. We observe more recombination events than expected if using the correct recombination probability (used in simulations). We circumvent this bias multiplying the transition probability by a factor  $10^{-1}$ ,  $10^{-2}$ ,  $10^{-4}$  and  $10^{-5}$  for the pruned SNP list with 0.1, 0.2, 0.5 and 0.8 pruning thresholds. 44,699, 72,418, 136,284, 194,432 SNPs were retained at the 4 pruning thresholds.

| No. of generation     |                  | 2        | 4        | 6        | 8        |
|-----------------------|------------------|----------|----------|----------|----------|
| Independent SNP model | Pruned SNP (0.1) | 995(550) | 961(540) | 974(539) | 987(537) |
|                       | Pruned SNP (0.2) | 899(487) | 880(491) | 864(466) | 927(491) |
|                       | Pruned SNP (0.5) | 809(444) | 823(448) | 819(436) | 837(444) |
|                       | Pruned SNP (0.8) | 834(441) | 810(429) | 812(442) | 799(447) |
| SPAMIX                | Pruned SNP (0.1) | 549(318) | 558(314) | 567(334) | 546(326) |
|                       | Pruned SNP (0.2) | 548(329) | 550(326) | 541(295) | 562(336) |
|                       | Pruned SNP (0.5) | 551(390) | 557(359) | 590(371) | 588(467) |
|                       | Pruned SNP (0.8) | 580(478) | 589(557) | 634(576) | 586(538) |

Table S3: The outliers from SPAMIX analysis. They are POPRES admixed individuals with ancestral predictions inconsistent with their self-reported ancestries.

| POPRES ID | self        | father      | PGF         | PGM            | mother      | MGF         | MGM         | Pred. Locations                                         |
|-----------|-------------|-------------|-------------|----------------|-------------|-------------|-------------|---------------------------------------------------------|
| 4183      | Austria     | Austria     | Austria     | Czech Republic | Poland      | Russia      | Switzerland | (52.26 12.61),(43.78 -9.81),(41.63 16.61),(52.44 13.30) |
| 28710     | France      | Poland      | Germany     | Poland         | France      | France      | France      | (39.47 5.82),(37.97 14.65),(40.99 15.31)                |
| 24943     | Sweden      | Sweden      | Sweden      | Sweden         | Finland     | Russia      | France      | (48.03 6.91),(48.09 6.67),(57.35 8.79)                  |
| 20086     | France      | France      | France      | France         | France      | Switzerland | France      | (35.62 13.04),(43.65 16.14)                             |
| 5550      | Germany     | Switzerland | Switzerland | Switzerland    | Germany     | Germany     | Germany     | (46.45 23.86),(55.66 -7.40)                             |
| 47799     | Germany     | Germany     | Russia      | Germany        | Germany     | Germany     | Germany     | (50.20 14.77),(53.02 3.44)                              |
| 32002     | France      | France      | France      | France         | Turkey      | Turkey      | France      | (35.85 10.05),(40.75 13.59)                             |
| 27995     | Poland      | Poland      | Poland      | Poland         | Russia      | Russia      | Poland      | (55.65 12.49),(47.67 10.56)                             |
| 38489     | Russia      | Russia      | Germany     | Germany        | Switzerland | Switzerland | Russia      | (46.59 5.62),(46.67 7.38),(49.86 -0.22)                 |
| 7251      | Austria     | Switzerland | Switzerland | Switzerland    | Austria     | Austria     | Austria     | (38.64 -6.89),(62.19 30.99)                             |
| 17323     | Switzerland | Russia      | Russia      | Russia         | Switzerland | Switzerland | Switzerland | (50.99 -1.41),(46.35 10.78)                             |
| 20046     | France      | Russia      | Russia      | Russia         | Poland      | Poland      | Poland      | (37.25 14.09),(44.40 9.91)                              |
| 24429     | France      | Russia      | Russia      | Russia         | France      | France      | France      | (50.59 1.93),(44.02 4.97)                               |
| 39106     | Israel      | Greece      | Greece      | Greece         | Russia      | Germany     | Sweden      | (41.68 4.76),(36.35 23.47),(41.78 5.04)                 |
| 49793     | France      | Romania     | Romania     | Romania        | Russia      | Russia      | Russia      | (41.31 9.54),(40.83 19.25)                              |
| 47137     | France      | France      | Germany     | Germany        | Austria     | Switzerland | Switzerland | (38.01 12.40),(41.96 12.49)                             |
| 34848     | France      | Turkey      | Turkey      | Turkey         | France      | France      | France      | (38.75 9.47),(37.47 14.32)                              |
| 10635     | France      | France      | France      | France         | Russia      | Russia      | Bulgaria    | (53.28 5.54),(45.50 5.56),(50.11 7.61)                  |
| 18548     | France      | Germany     | Germany     | Germany        | Russia      | Russia      | Russia      | (42.54 13.24),(38.67 9.20)                              |
| 22423     | Russia      | Ukraine     | Ukraine     | Ukraine        | Russia      | Russia      | Russia      | (53.32 7.55),(50.79 17.17)                              |
| 13411     | France      | Russia      | Russia      | Russia         | France      | France      | France      | (39.22 9.31),(46.77 5.19)                               |
| 42867     | Switzerland | Switzerland | Switzerland | Russia         | Switzerland | Switzerland | Switzerland | (47.42 16.49),(49.47 -4.12)                             |
| 33744     | Switzerland | Switzerland | Russia      | Germany        | Spain       | Switzerland | Switzerland | (42.39 13.98),(40.81 5.44),(50.07 2.19)                 |
| 31350     | Israel      | Romania     | Romania     | Romania        | Russia      | Russia      | Russia      | (42.23 7.63),(38.30 19.55)                              |
| 15990     | France      | Russia      | Russia      | Russia         | Greece      | Greece      | Greece      | (38.60 5.52),(38.88 15.46)                              |

## References

- [1] Yang, W., Novembre, J., Eskin, E., and Halperin, E. (2012). A model-based approach for analysis of spatial structure in genetic data. *Nature genetics* *44*, 725–731.
