# Supplementary material for: Spatial Localization of Recent Ancestors for Admixed Individuals
Source: PubMed Central journal article supplement (PMC4267945; doi:10.1534/g3.114.014274), 2014-11-03
Supplement: supp_g3.114.014274_FigureS2.pdf [file supp_g3.114.014274_FigureS2.pdf]

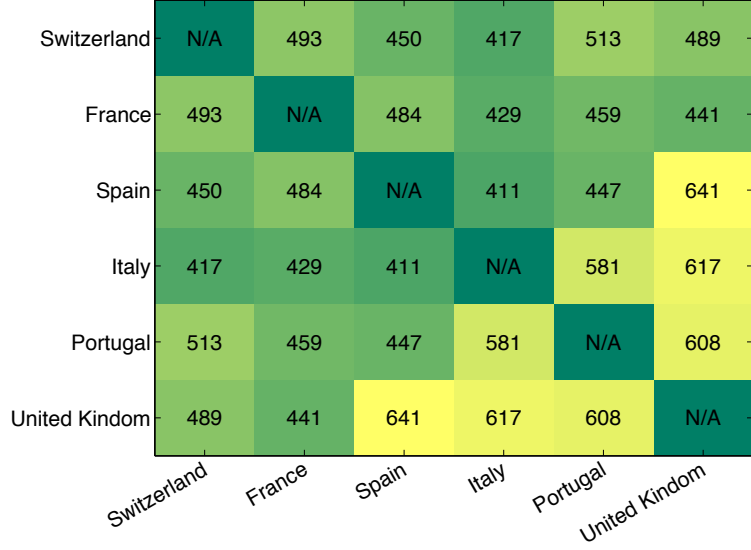

Figure S2: Average Prediction error (Km) for six country pairs with largest populations.
