# Supplementary material for: Spatial Localization of Recent Ancestors for Admixed Individuals
Source: PubMed Central journal article supplement (PMC4267945; doi:10.1534/g3.114.014274), 2014-11-03
Supplement: supp_g3.114.014274_FigureS3.pdf [file supp_g3.114.014274_FigureS3.pdf]

|               |     |    |    |     |    |     |
|---------------|-----|----|----|-----|----|-----|
| Switzerland   | 0   | 28 | 63 | 121 | 61 | 87  |
| France        | 28  | 0  | 18 | 55  | 23 | 30  |
| Spain         | 63  | 18 | 0  | 52  | 41 | 42  |
| Italy         | 121 | 55 | 52 | 0   | 67 | 104 |
| Portugal      | 61  | 23 | 41 | 67  | 0  | 61  |
| United Kindom | 87  | 30 | 42 | 104 | 61 | 0   |

Figure S3: Number for simulations for six country pairs with largest populations.
