# Supplementary material for: Spatial Localization of Recent Ancestors for Admixed Individuals
Source: PubMed Central journal article supplement (PMC4267945; doi:10.1534/g3.114.014274), 2014-11-03
Supplement: supp_g3.114.014274_TableS3.pdf [file supp_g3.114.014274_TableS3.pdf]

Table S3: The outliers from SPAMIX analysis. They are POPRES admixed individuals with ancestral predictions inconsistent with their self-reported ancestries.

| POPRES ID | self        | father      | PGF         | PGM            | mother      | MGF         | MGM         | Pred. Locations                                         |
|-----------|-------------|-------------|-------------|----------------|-------------|-------------|-------------|---------------------------------------------------------|
| 4183      | Austria     | Austria     | Austria     | Czech Republic | Poland      | Russia      | Switzerland | (52.26 12.61),(43.78 -9.81),(41.63 16.61),(52.44 13.30) |
| 28710     | France      | Poland      | Germany     | Poland         | France      | France      | France      | (39.47 5.82),(37.97 14.65),(40.99 15.31)                |
| 24943     | Sweden      | Sweden      | Sweden      | Sweden         | Finland     | Russia      | France      | (48.03 6.91),(48.09 6.67),(57.35 8.79)                  |
| 20086     | France      | France      | France      | France         | France      | Switzerland | France      | (35.62 13.04),(43.65 16.14)                             |
| 5550      | Germany     | Switzerland | Switzerland | Switzerland    | Germany     | Germany     | Germany     | (46.45 23.86),(55.66 -7.40)                             |
| 47799     | Germany     | Germany     | Russia      | Germany        | Germany     | Germany     | Germany     | (50.20 14.77),(53.02 3.44)                              |
| 32002     | France      | France      | France      | France         | Turkey      | Turkey      | France      | (35.85 10.05),(40.75 13.59)                             |
| 27995     | Poland      | Poland      | Poland      | Poland         | Russia      | Russia      | Poland      | (55.65 12.49),(47.67 10.56)                             |
| 38489     | Russia      | Russia      | Germany     | Germany        | Switzerland | Switzerland | Russia      | (46.59 5.62),(46.67 7.38),(49.86 -0.22)                 |
| 7251      | Austria     | Switzerland | Switzerland | Switzerland    | Austria     | Austria     | Austria     | (38.64 -6.89),(62.19 30.99)                             |
| 17323     | Switzerland | Russia      | Russia      | Russia         | Switzerland | Switzerland | Switzerland | (50.99 -1.41),(46.35 10.78)                             |
| 20046     | France      | Russia      | Russia      | Russia         | Poland      | Poland      | Poland      | (37.25 14.09),(44.40 9.91)                              |
| 24429     | France      | Russia      | Russia      | Russia         | France      | France      | France      | (50.59 1.93),(44.02 4.97)                               |
| 39106     | Israel      | Greece      | Greece      | Greece         | Russia      | Germany     | Sweden      | (41.68 4.76),(36.35 23.47),(41.78 5.04)                 |
| 49793     | France      | Romania     | Romania     | Romania        | Russia      | Russia      | Russia      | (41.31 9.54),(40.83 19.25)                              |
| 47137     | France      | France      | Germany     | Germany        | Austria     | Switzerland | Switzerland | (38.01 12.40),(41.96 12.49)                             |
| 34848     | France      | Turkey      | Turkey      | Turkey         | France      | France      | France      | (38.75 9.47),(37.47 14.32)                              |
| 10635     | France      | France      | France      | France         | Russia      | Russia      | Bulgaria    | (53.28 5.54),(45.50 5.56),(50.11 7.61)                  |
| 18548     | France      | Germany     | Germany     | Germany        | Russia      | Russia      | Russia      | (42.54 13.24),(38.67 9.20)                              |
| 22423     | Russia      | Ukraine     | Ukraine     | Ukraine        | Russia      | Russia      | Russia      | (53.32 7.55),(50.79 17.17)                              |
| 13411     | France      | Russia      | Russia      | Russia         | France      | France      | France      | (39.22 9.31),(46.77 5.19)                               |
| 42867     | Switzerland | Switzerland | Switzerland | Russia         | Switzerland | Switzerland | Switzerland | (47.42 16.49),(49.47 -4.12)                             |
| 33744     | Switzerland | Switzerland | Russia      | Germany        | Spain       | Switzerland | Switzerland | (42.39 13.98),(40.81 5.44),(50.07 2.19)                 |
| 31350     | Israel      | Romania     | Romania     | Romania        | Russia      | Russia      | Russia      | (42.23 7.63),(38.30 19.55)                              |
| 15990     | France      | Russia      | Russia      | Russia         | Greece      | Greece      | Greece      | (38.60 5.52),(38.88 15.46)                              |
